# Supplementary material for: Community composition of black flies during and after the 2020 vesicular stomatitis virus outbreak in Southern New Mexico, USA
Source: PubMed Central journal article supplement (PMC10900647; doi:10.1186/s13071-024-06127-6), 2024-02-27
Supplement: 13071_2024_6127_MOESM2_ESM.pdf [file 13071_2024_6127_MOESM2_ESM.pdf]

a.

|             | <i>S. meridionale</i> |                 | <i>S. mediovittatum</i> |                 | <i>S. robynae</i>   |                 | <i>S. griseum/notatum</i> |                 |
|-------------|-----------------------|-----------------|-------------------------|-----------------|---------------------|-----------------|---------------------------|-----------------|
|             | To Voucher Sequence   | Between Samples | To Voucher Sequence     | Between Samples | To Voucher Sequence | Between Samples | To Voucher Sequence       | Between Samples |
| <b>Min</b>  | 95.0%                 | 95.1%           | 95.0%                   | 96.1%           | 96.7%               | 95.3%           | 98.3%                     | NA              |
| <b>Max</b>  | 99.4%                 | 99.8%           | 97.2%                   | 99.8%           | 98.4%               | 99.7%           | 98.3%                     | NA              |
| <b>Avg</b>  | 97.6%                 | 98.0%           | 96.4%                   | 99.1%           | 97.8%               | 98.2%           | 98.3%                     | NA              |
| <b>± SD</b> | 0.7%                  | 0.8%            | 0.4%                    | 0.5%            | 0.4%                | 0.9%            | N/A                       | NA              |

b.

|             | <i>S. meridionale</i> |                 | <i>S. mediovittatum</i> |                 | <i>S. robynae</i>   |                 |
|-------------|-----------------------|-----------------|-------------------------|-----------------|---------------------|-----------------|
|             | To Voucher Sequence   | Between Samples | To Voucher Sequence     | Between Samples | To Voucher Sequence | Between Samples |
| <b>Min</b>  | 94.90%                | 95.20%          | 95.10%                  | 96.10%          | 96.80%              | 96.80%          |
| <b>Max</b>  | 99.20%                | 100%            | 97.60%                  | 99.80%          | 98.40%              | 99%             |
| <b>Avg</b>  | 97.70%                | 97.90%          | 96.20%                  | 99.00%          | 97.90%              | 98.10%          |
| <b>± SD</b> | 0.70%                 | 0.90%           | 0.70%                   | 0.80%           | 0.50%               | 0.50%           |

c.

|             | <i>S. argus</i>     |                 | <i>S. encisoii</i>  |                 | <i>S. vittatum</i>  |                 |
|-------------|---------------------|-----------------|---------------------|-----------------|---------------------|-----------------|
|             | To Voucher Sequence | Between Samples | To Voucher Sequence | Between Samples | To Voucher Sequence | Between Samples |
| <b>Min</b>  | 98.10%              | 97.314          | 99.842              | NA              | 97.91%              | 97.30%          |
| <b>Max</b>  | 99.84%              | 100%            | 99.842              | NA              | 99.842              | 100%            |
| <b>Avg</b>  | 98.79%              | 98.90%          | 99.842              | NA              | 99.38%              | 99.13%          |
| <b>± SD</b> | 0.54%               | 0.74%           | NA                  | NA              | 0.48%               | 0.61            |

**Additional File 5:** a) Minimum, maximum, and average sequence identity % ± standard deviation of adult black fly sequences sampled along Rio Grande River in 2020. b) Minimum, maximum, and average sequence identity % ± standard deviation of adult black fly sequences sampled along Rio Grande River, stable and lateral sites in 2022. c) Minimum, maximum, and average sequence identity % ± standard deviation of black fly larvae sequences sampled in Rio Grande River in 2023.
